# Supplementary material
Source: PubMed Central journal article supplement (PMC9357111)
Supplement: NIHMS1806853-supplement-1.pdf [file NIHMS1806853-supplement-1.pdf]

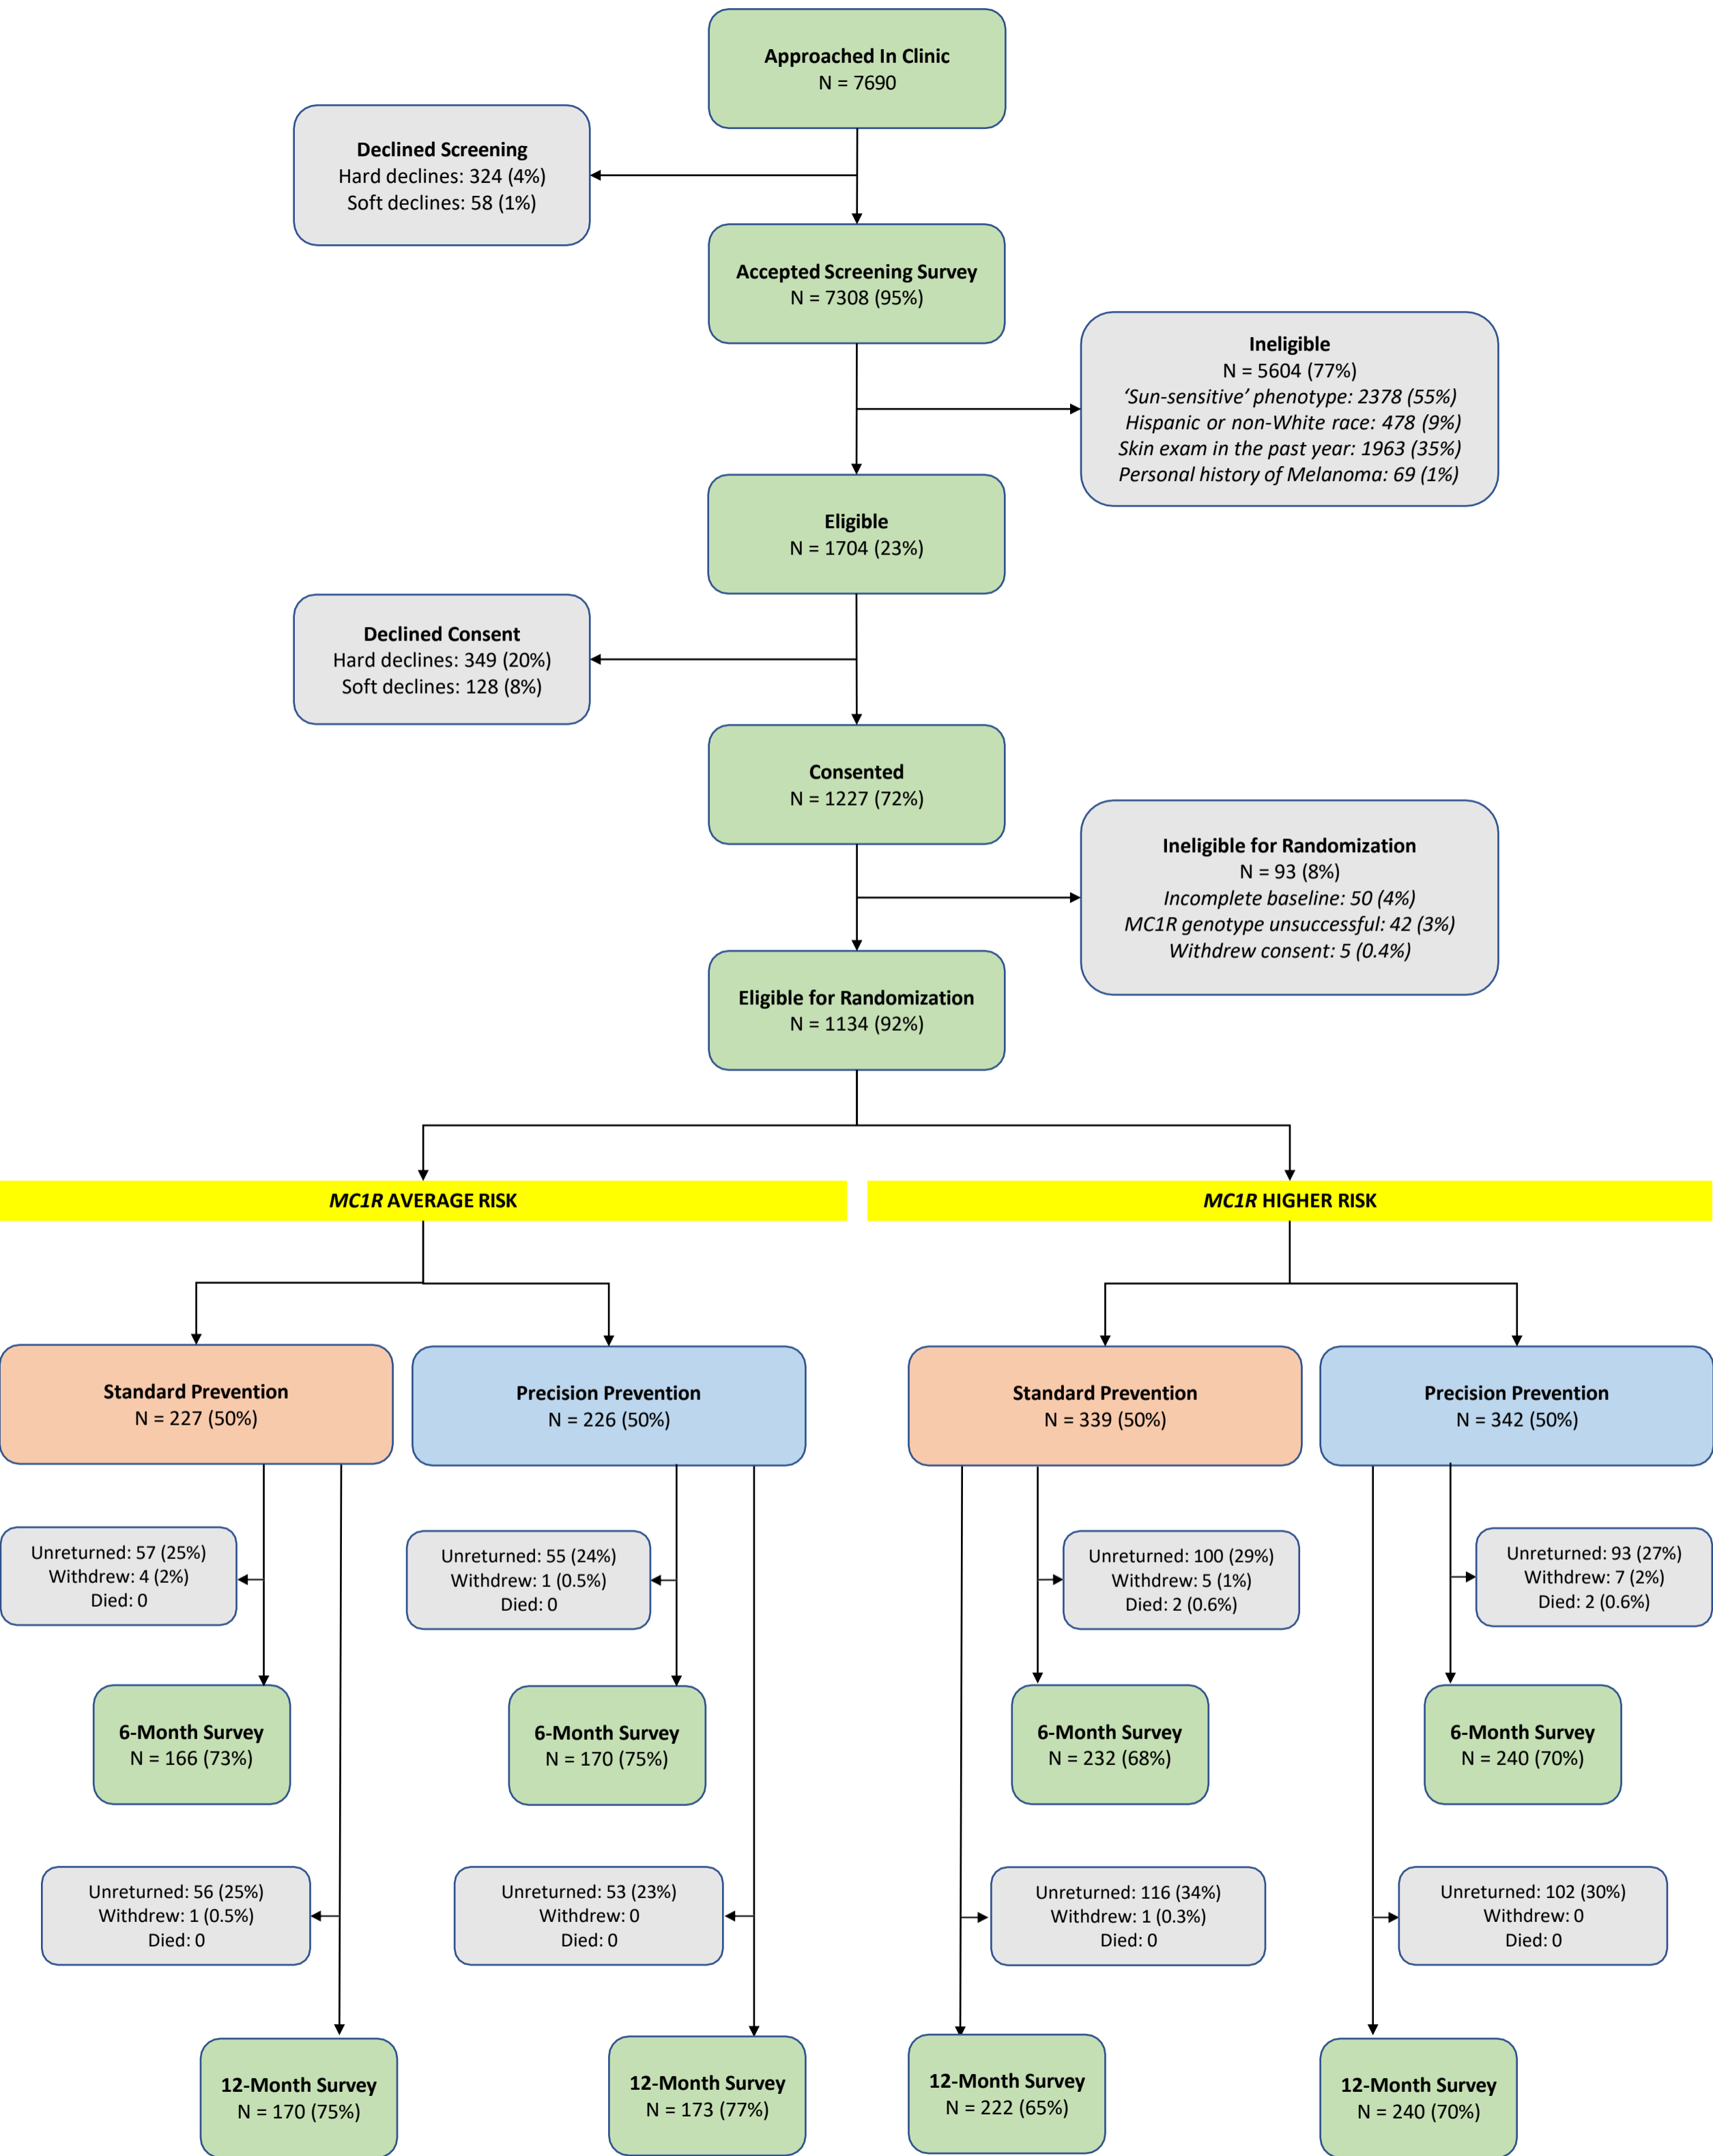

Supplemental Figure 1  
 Supplemental Figure shows CONSORT diagram of parent randomized intervention trial
